# Supplementary material for: Impact of the presence of clinical consequences of pulp involvement due to caries on Oral Health-Related Quality of Life in Brazilian schoolchildren: A Cross-Sectional Study
Source: Research Square preprint supplement (doi:10.21203/rs.3.rs-6762323/v1), 2025-06-11
Supplement: Supplementary file 1 [file a5abfbe8c7e11794afea755f.docx]

| **Table S1**: Sex and clinical characteristics of the non-respondent students (dropouts) | | | | | | | |
| --- | --- | --- | --- | --- | --- | --- | --- |
| **Variables** | | **Schoolchildren** | | | | | |
|  | | **5-year-old** | | **8-year-old** | | **12-year-old** | |
|  | | **(n=49)** | | **(n= 34)** | | **(n=93)** | |
|  | | n | % | n | % | n | % |
| Gender | Male | 25 | 51.0 | 20 | 58.8 | 55 | 59.1 |
| Female | 24 | 49.0 | 14 | 41.2 | 38 | 40.9 |
| **Clinical variables** |  |  |  |  |  |  |  |
| dmf-t/DMF-T | Absence (dmf-t/DMF-T=0) | 23 | 46.9 | 5 | 14.7 | 38 | 40.9 |
| Presence (dmf-t/DMF-T ≥1) | 26 | 53.1 | 29 | 85.3 | 55 | 49.1 |
|  |  | Mean | SD | Mean | SD | Mean | SD |
|  |  | 2.29 | 2.97 | 3.74 | 2.42 | 1.62 | 1.80 |
|  |  | n | % | n | % | n | % |
| pufa/PUFA | Absence (pufa/PUFA=0) | 44 | 89.8 | 26 | 76.5 | 80 | 86.0 |
| Presence (pufa/PUFA≥1) | 5 | 10.2 | 8 | 23.5 | 13 | 14.0 |
|  |  | Mean | SD | Mean | SD | Mean | SD |
|  |  | 0.10 | 0.31 | 0.44 | 0.86 | 0.18 | 0.49 |
| **Groups** |  | n | % | n | % | n | % |
| **no caries** | dmf-t/DMF-T=0 | 23 | 46.9 | 5 | 14.7 | 38 | 40.9 |
| **with caries** | dmf-t/DMF-T ≥1 and pufa/PUFA=0 | 21 | 42.9 | 21 | 61.8 | 42 | 45.2 |
| **with caries and Pufa** | dmf-t/DMF-T ≥1 and pufa/PUFA≥1 | 5 | 10.2 | 8 | 23.5 | 13 | 14.0 |
